# Supplementary material
Source: PubMed Central journal article supplement (PMC2927046)
Supplement: blood-2009-04-215186_1.pdf [file blood-2009-04-215186_1.pdf]

---

|                                                                                                         |                    |
|---------------------------------------------------------------------------------------------------------|--------------------|
| Total Number of HIV <sup>+</sup> subjects recruited into the cohort                                     | 1,132              |
| Number of seroconverters (n, %)                                                                         | 515 (45.5%)        |
| <i>DARC</i> genotype data available on:                                                                 | 1,096 (96.8%)      |
| Ethnicity (n, %)                                                                                        |                    |
| European Americans (EA)                                                                                 | 603 (55.0%)        |
| African Americans (AA)                                                                                  | 397 (36.2%)        |
| Others (OT)                                                                                             | 96 (8.8%)          |
| Number of HIV <sup>+</sup> subjects with WBC count information (total number of WBC count measurements) |                    |
| All subjects                                                                                            | 1,096 (26,855)     |
| European Americans (EA)                                                                                 | 603 (16,302)       |
| African Americans (AA)                                                                                  | 397 (8,266)        |
| Others (OT)                                                                                             | 96 (2,287)         |
| Maximum length of follow-up (yrs)                                                                       | 15.47              |
| Total follow-up (person years)                                                                          | 7,125.15           |
| Age at cohort inception (mean $\pm$ s.d. yrs)                                                           | 29.9 $\pm$ 7.2     |
| Proportion of males (n, %)                                                                              | 1026 (93.6%)       |
| Baseline CD4 <sup>+</sup> T cell count (mean $\pm$ s.e. cells/ $\mu$ l)                                 | 605.07 $\pm$ 18.29 |
| Initial (steady-state) viral load (median copies/ml, IQR)                                               | 22618, 64500       |
| Number of deaths over follow-up (%)                                                                     | 440 (38.9%)        |

---
